# Supplementary material
Source: Springer Nature journal article supplement (https://www.springermedizin.de/resource/supplementary/12943_2010_833_MOESM10_ESM.pdf/9554940)

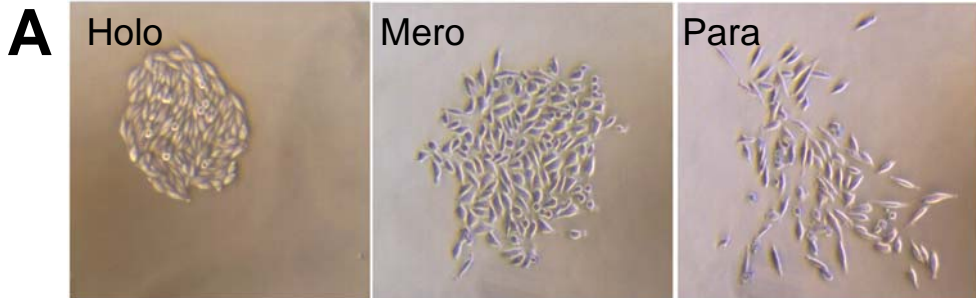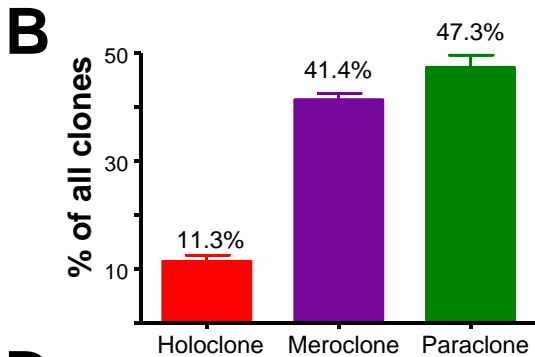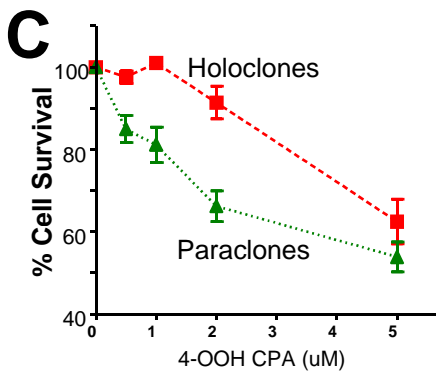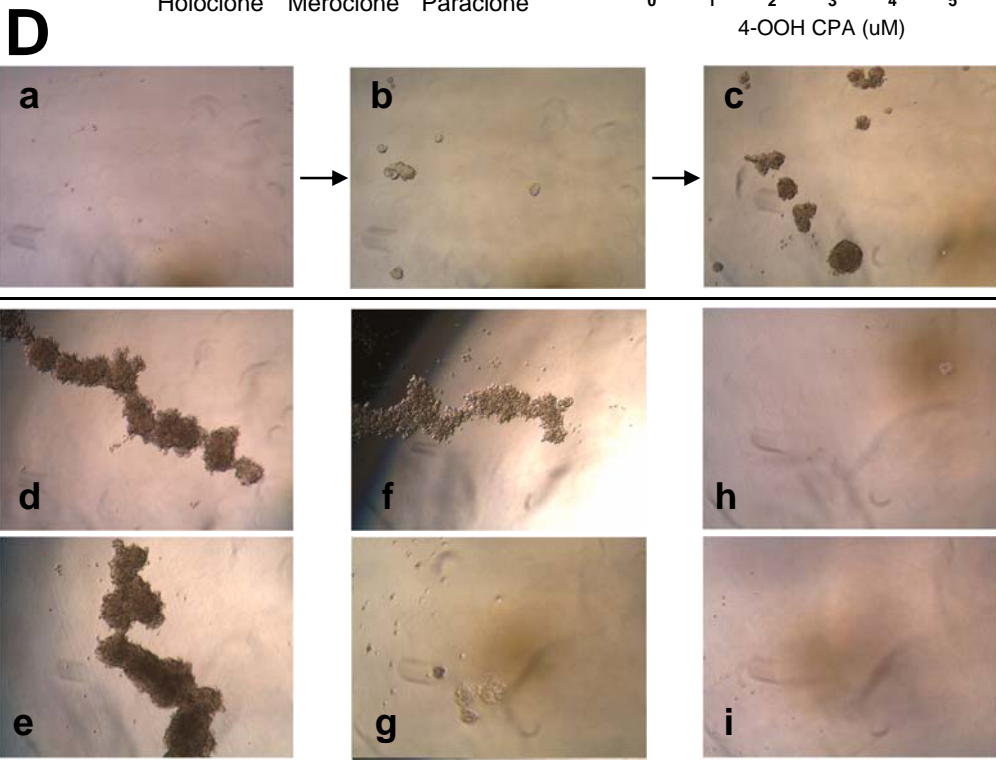

Supplement: MOESM10 [file 9554940]
